# Supplementary material
Source: publisher figshare collection journal article supplement (https://acs.figshare.com/ndownloader/files/32871164)
Supplement: Supplementary file 1 [file 32871164]

SUPPLEMENTAL INFORMATION FOR:

**Solvent-driven transformation of Zn/Cd<sup>2+</sup>-  
deoxycholate assemblies**

Rachelle M. S. Smith<sup>1</sup>, Mehran Amiri<sup>1</sup>, Nicolas P. Martin<sup>1,2</sup>, Alice  
Lulich<sup>1</sup>, Lauren N. Palys,<sup>1</sup> Guomin Zhu<sup>3</sup>, James J. De Yoreo<sup>3,4</sup> and May  
Nyman<sup>1\*</sup>

<sup>1</sup>Department of Chemistry, Oregon State University, Corvallis, OR 97330 USA

<sup>2</sup>current address: Institut Jean Lamour, UMR 7198 CNRS – Université de Lorraine,  
Campus ARTEM, 2 allée André Guinier, 54011, Nancy, France

<sup>3</sup>Department of Materials Science and Engineering, University of Washington, Seattle,  
WA, 98195

<sup>4</sup>Physical Sciences Division, Pacific Northwest National Laboratory, Richland, WA  
99354

\*corresponding author: [may.nyman@oregonstate.edu](mailto:may.nyman@oregonstate.edu)

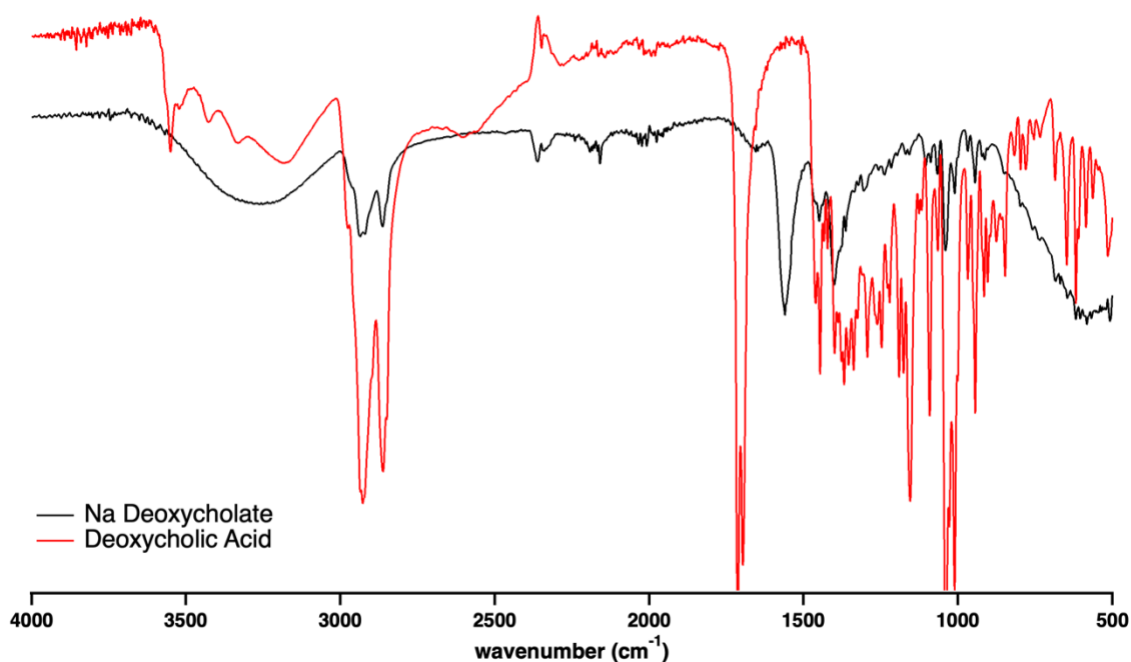

**Figure S1.** FT-IR of the synthesized sodium deoxycholate (Na-DOC). The formation of the salt is evident by the disappearance of the peaks from  $\sim 3600\text{--}3450\text{ cm}^{-1}$  which is the bonded OH on the carboxylic acid. The shift of the peak at  $\sim 1700\text{ cm}^{-1}$  to  $1600\text{ cm}^{-1}$ , as well, shows the change from a carboxylic acid to a carboxylate species.

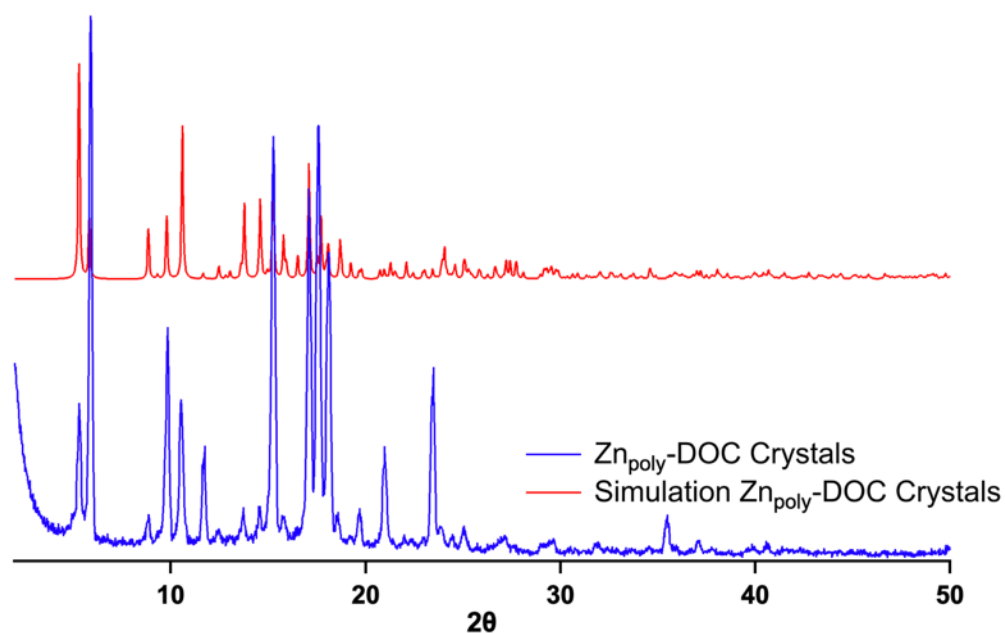

**Figure S2.** PXRD of  $\text{Zn}_{\text{poly}}\text{-DOC}$  shows the bulk purity of the crystals. They show clear preferential orientation.

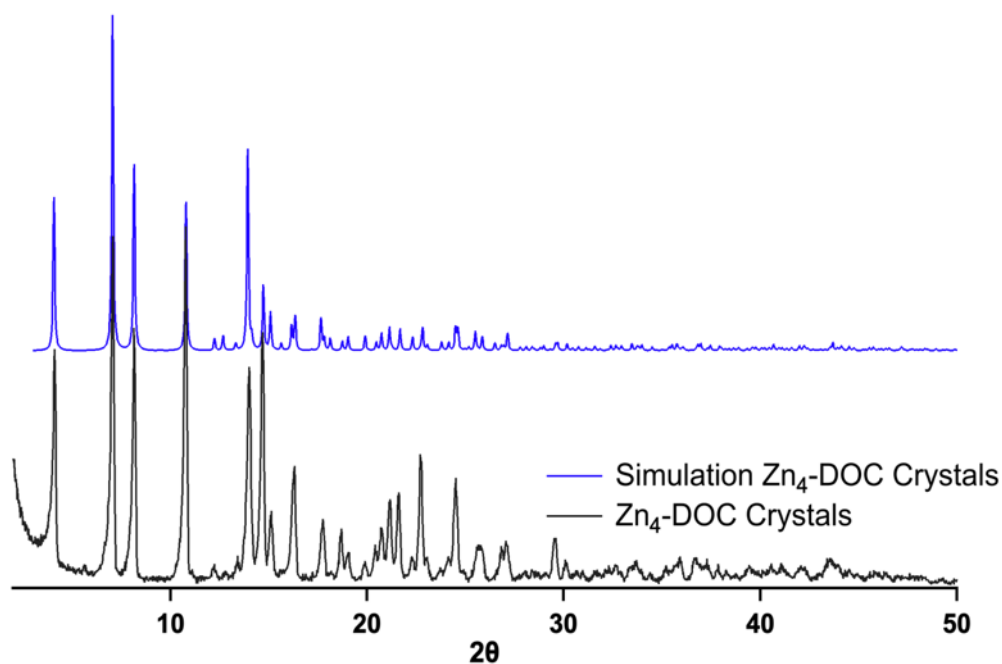

**Figure S3.**  $\text{Zn}_4\text{-DOC}$  bulk purity shown by PXRD.

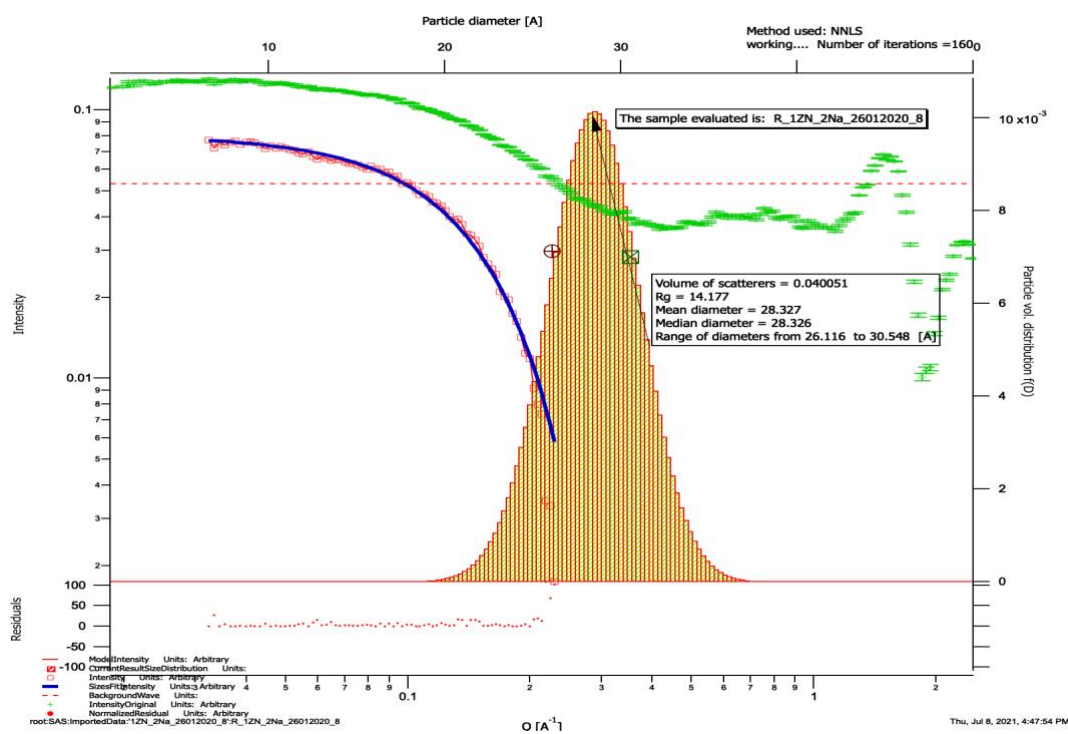

**Figure S4.** Size distribution of the  $\text{Zn}_{\text{poly}}\text{-DOC}$  bulk precipitate dissolved in MeOH. Green curve is the original scattering curve, red curve is the original curve minus a flat background, background is the red dashed horizontal line. Blue line is the model of the fit as a spherical particle. Red and green bar graph is the results of the size distribution analysis (also shown in **figure 4B**).

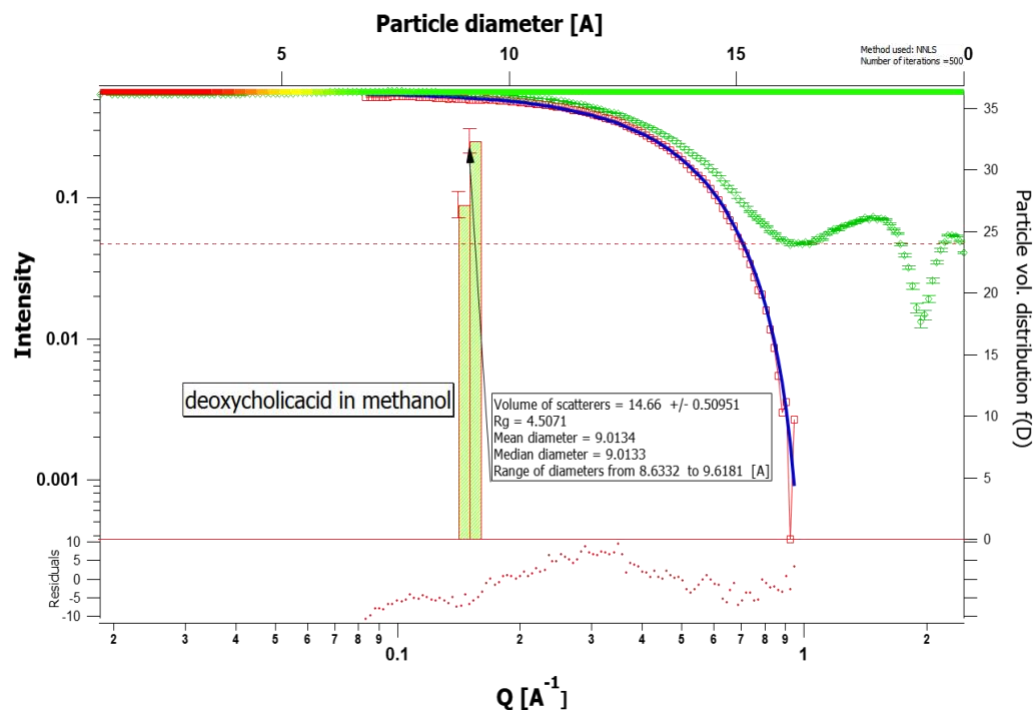

**Figure S5.** Size distribution of deoxycholic acid in methanol shows an extremely narrow shape indicating that it is a more spherical shape. We see a diameter of 9Å which indicates one individual deoxycholate in solution as opposed to a dimer or larger aggregates.

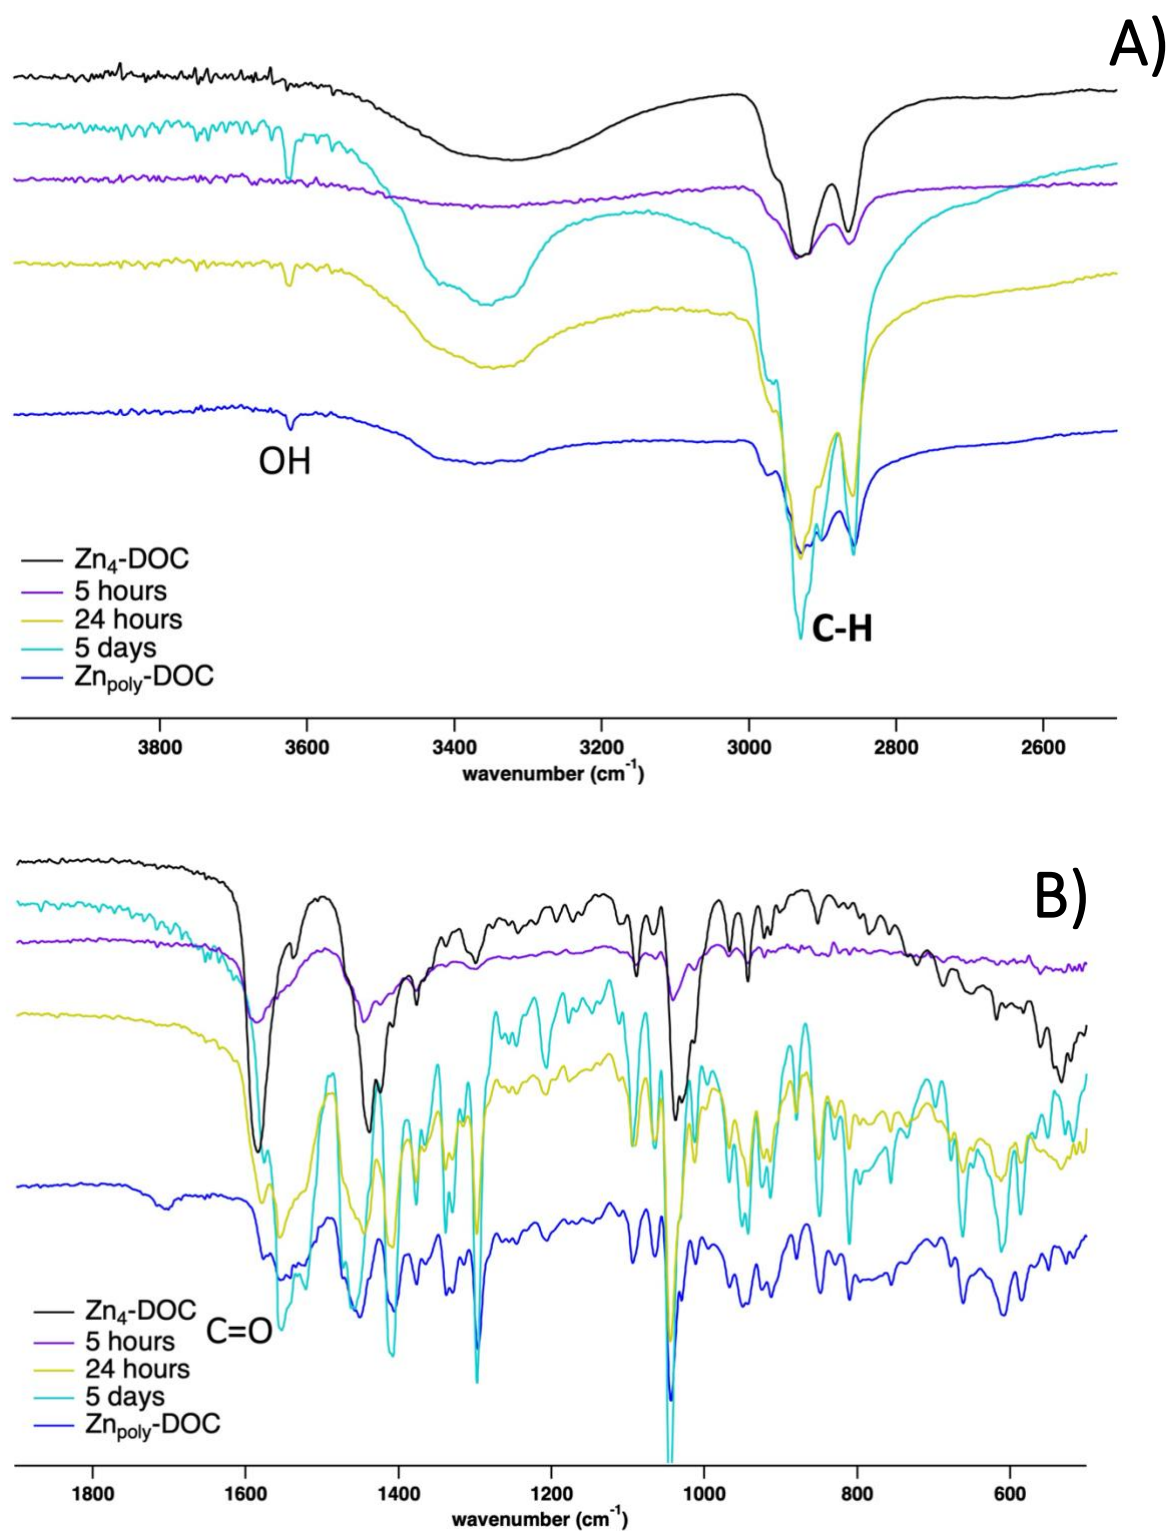

**Figure S6.** FT-IR shows the transformation from  $\text{Zn}_4\text{-DOC}$  to  $\text{Zn}_{\text{poly}}\text{-DOC}$  upon soaking in water. Key features are highlighted: **A)** shows the growth of a sharp and small peak at  $\sim 3600 \text{ cm}^{-1}$ . This is the water bonded to the Zn in the  $\text{Zn}_{\text{poly}}\text{-DOC}$ . Here it increases until 5 days. **B)** shows the more complex fingerprint regions. Focusing on the carboxylate bands at  $\sim 1600 \text{ cm}^{-1}$ ,  $\text{Zn}_4\text{-DOC}$  has one strong band, since all the deoxycholate ligands bridge the zinc-centers in the same way. The carboxylates of  $\text{Zn}_{\text{poly}}\text{-DOC}$  bonding is both monodentate and bidentate, yielding a split peak.

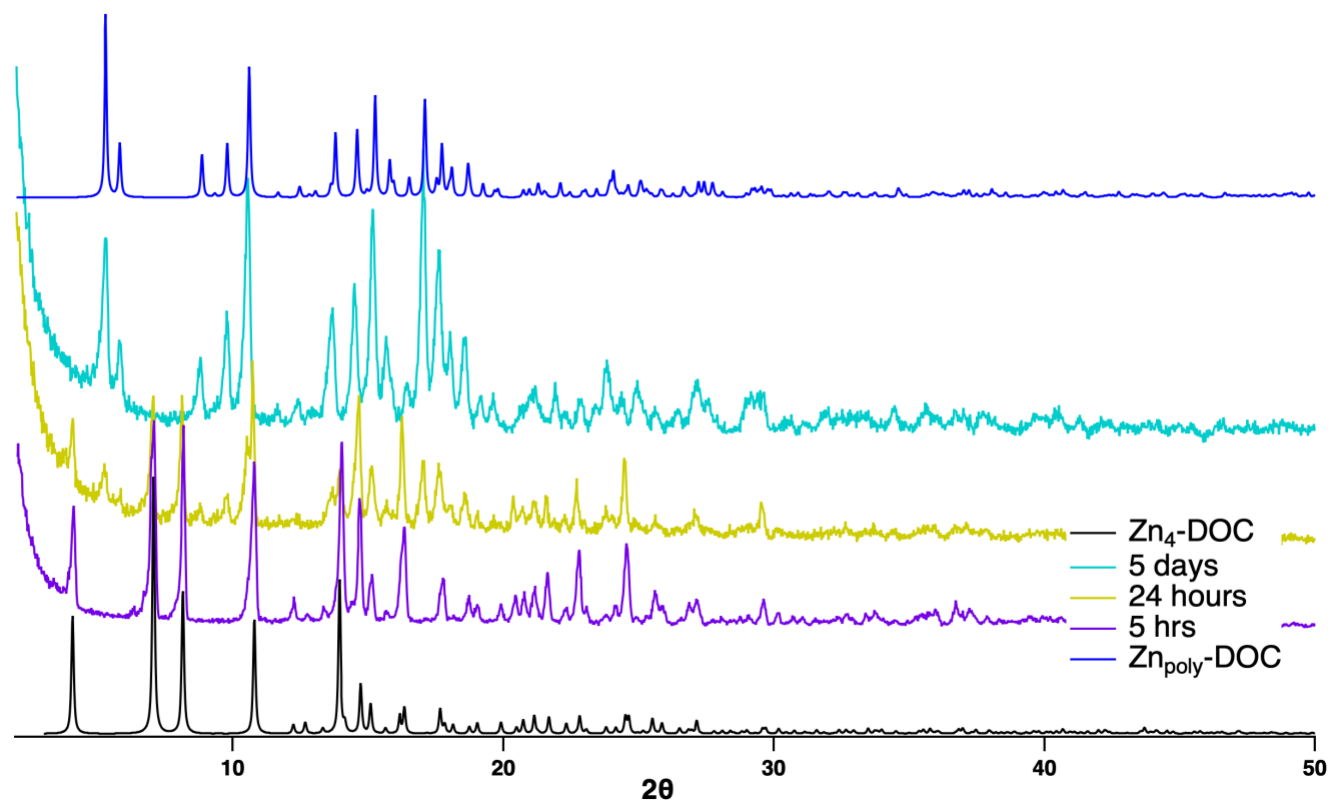

**Figure S7.** PXRD change shows the transformation from  $\text{Zn}_4\text{-DOC}$  to  $\text{Zn}_{\text{poly}}\text{-DOC}$ . The black and blue spectra are simulated from single-crystal X-ray data, and the green, purple, green and turquoise are experimental.

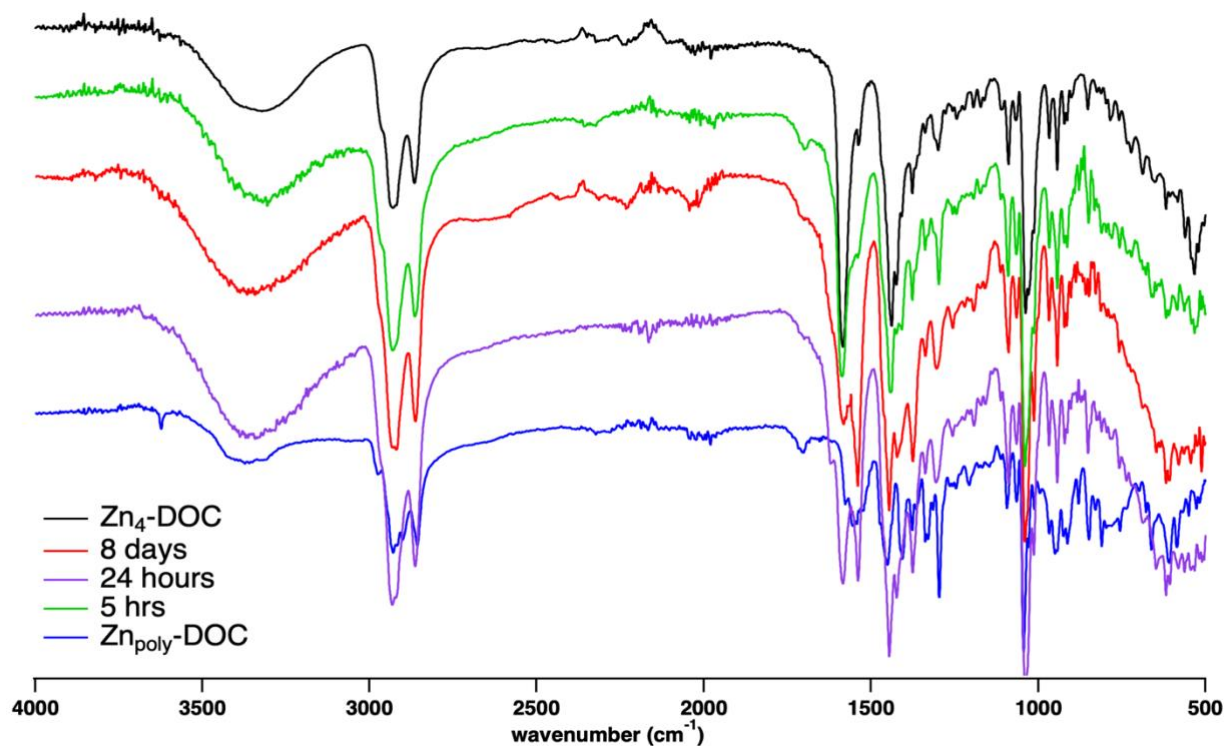

**Figure S8.** FT-IR shows the transformation of  $\text{Zn}_{\text{poly}}\text{-DOC}$  to  $\text{Zn}_4\text{-DOC}$  that results from MeOH diffusion. After 5 hours (green), we observe a match with pristine  $\text{Zn}_4\text{-DOC}$  (black). The peak at  $3600\text{ cm}^{-1}$  which is one of the key characteristics of the  $\text{Zn}_{\text{poly}}\text{-DOC}$  disappeared.

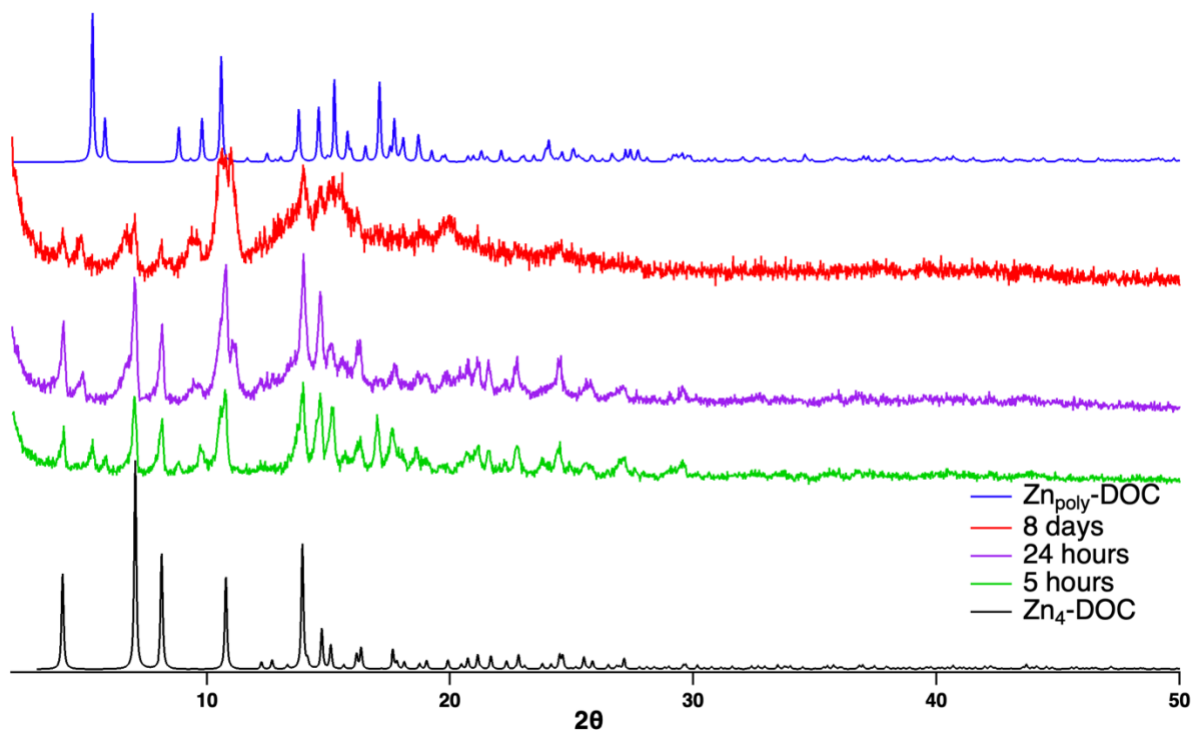

**Figure S9.** PXRD of the MeOH diffusion of  $\text{Zn}_{\text{poly}}\text{-DOC}$ , showing loss of long-range order. The black and blue spectra are simulated from single-crystal X-ray data, and the green, purple and red are experimental.

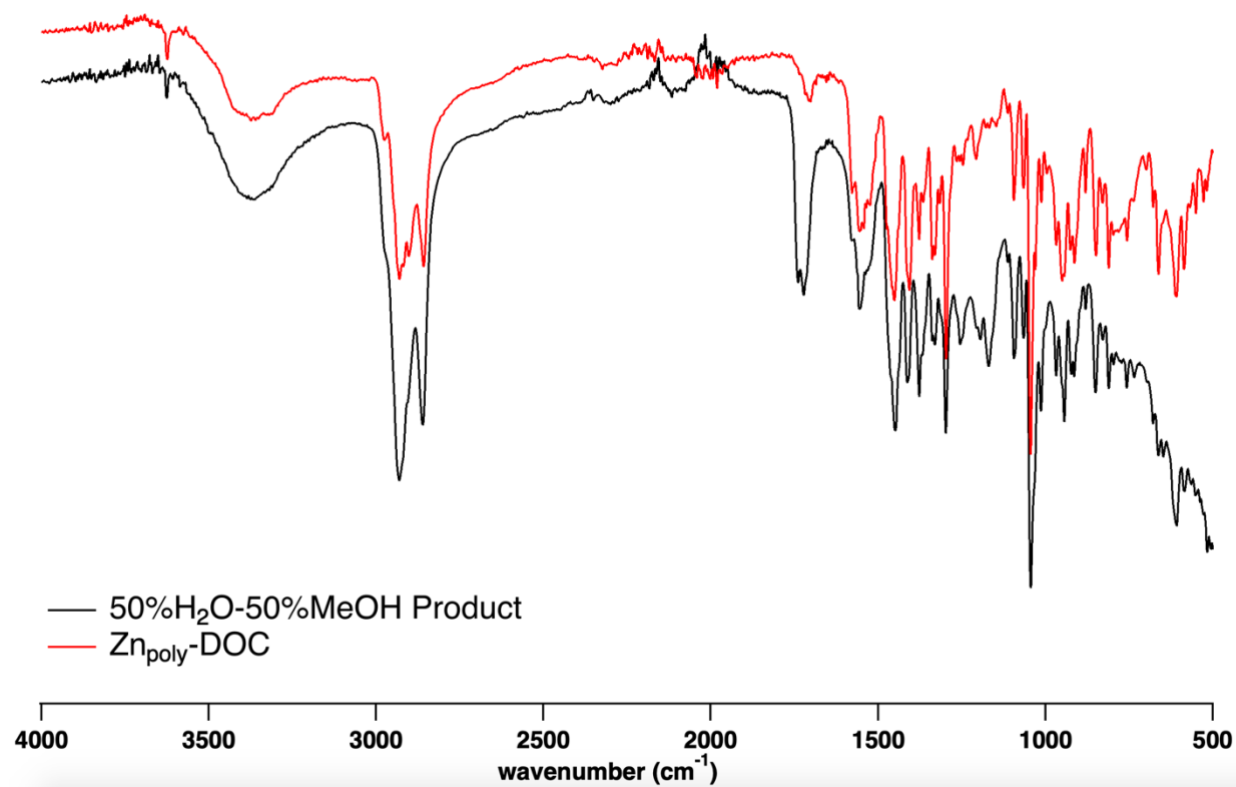

**Figure S10.** Synthesis in mixed solvent shows the preferential structure is the  $\text{Zn}_{\text{poly}}\text{-DOC}$  polymeric structure. We do see a peak at  $1700\text{ cm}^{-1}$  which indicates that some of the deoxycholate is protonated.



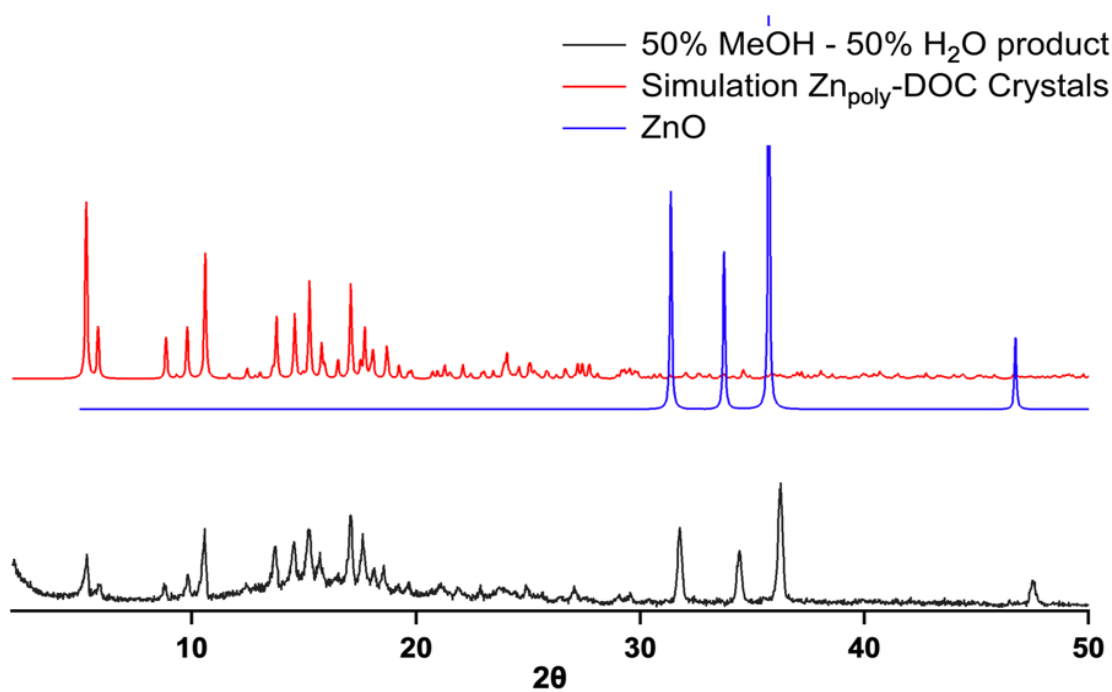

**Figure S11.** PXRD of mixed solvent shows that the product matches  $\text{Zn}_{\text{poly}}\text{-DOC}$  with some  $\text{ZnO}$  byproduct. The blue and red spectra are simulated from single-crystal X-ray data, and the black is experimental.

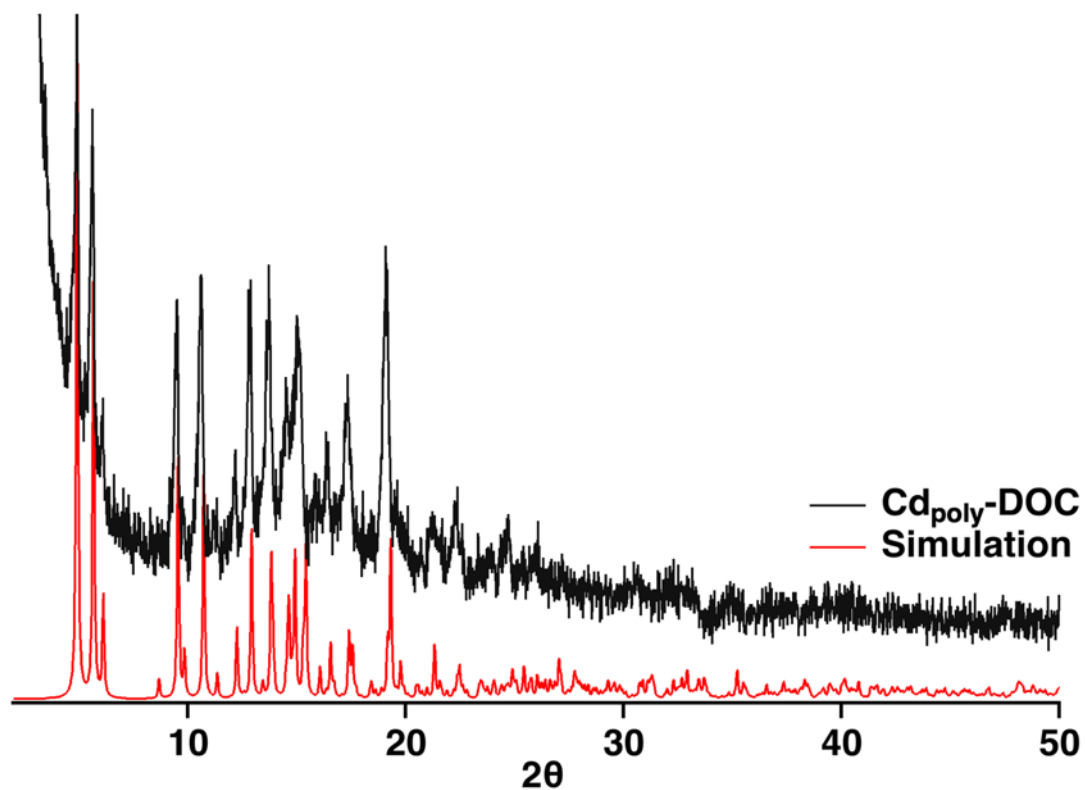

**Figure S12.** PXRD of  $\text{Cd}_{\text{poly}}\text{-DOC}$  shows a match with the PXRD simulated from the single-crystal structure.

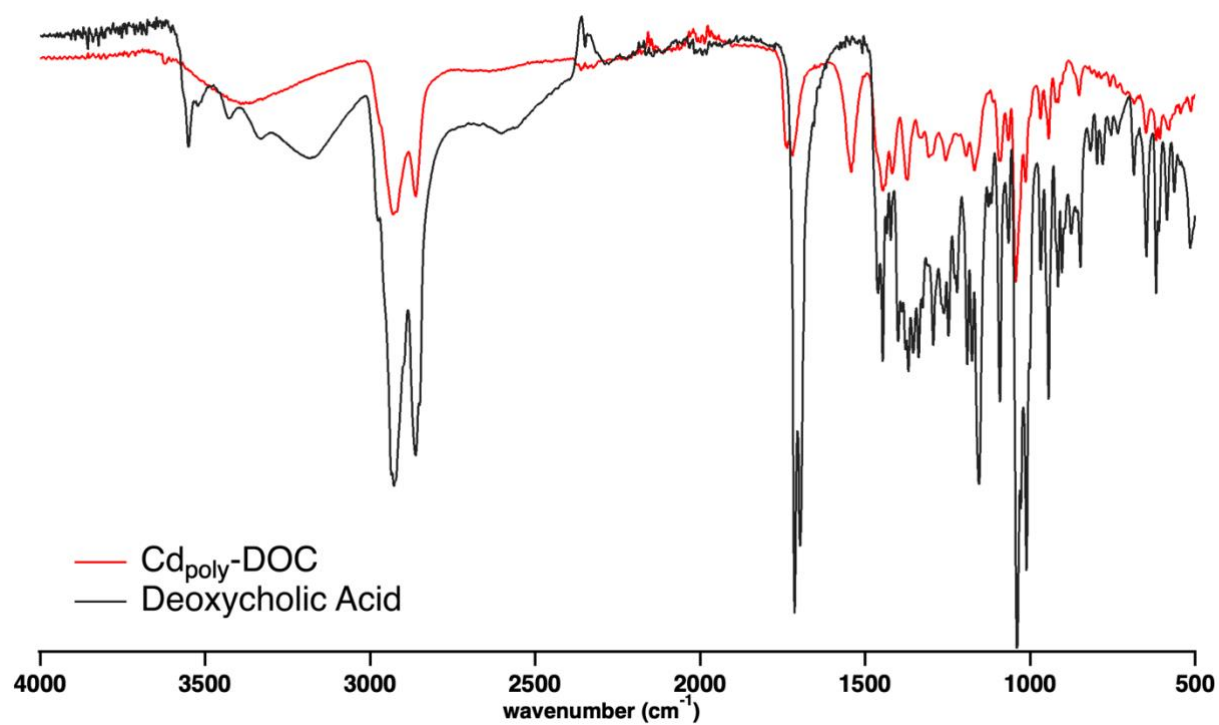

**Figure S13.** FT-IR of Cd<sub>poly</sub>-DOC crystals compared to that of deoxycholic acid.

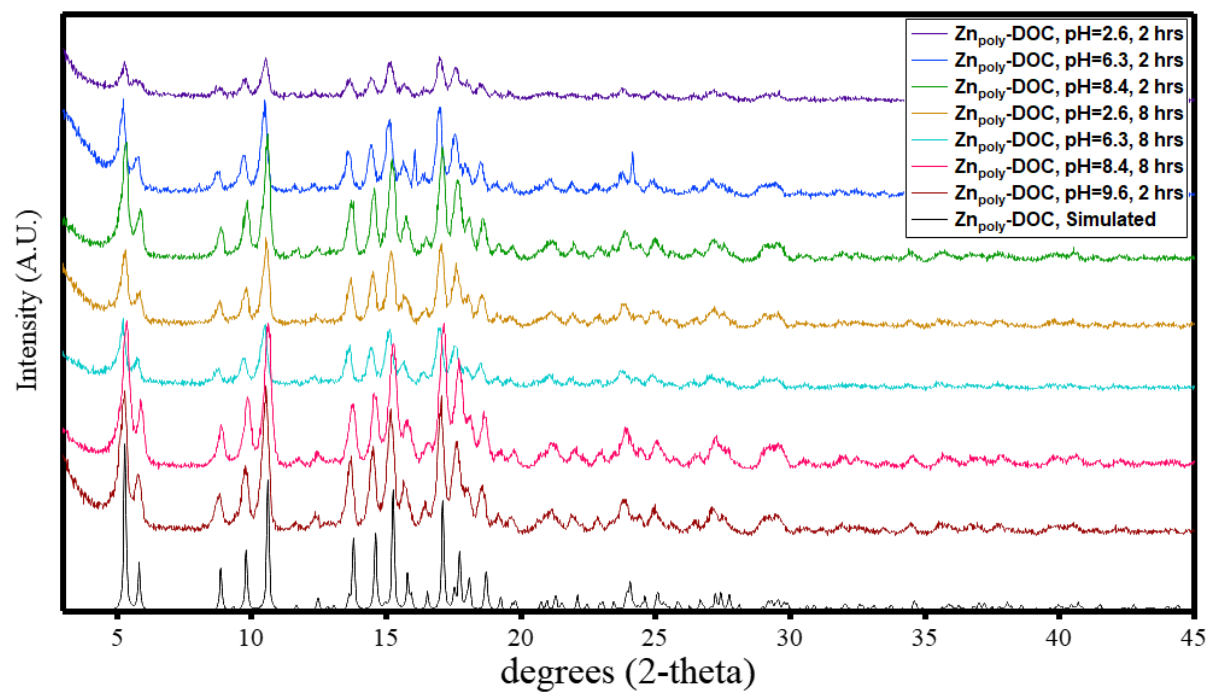

**Figure S14.** PXRD of **Zn<sub>poly</sub>-DOC** pH-stability tests, showing stability between pH ~ 6 to 9.

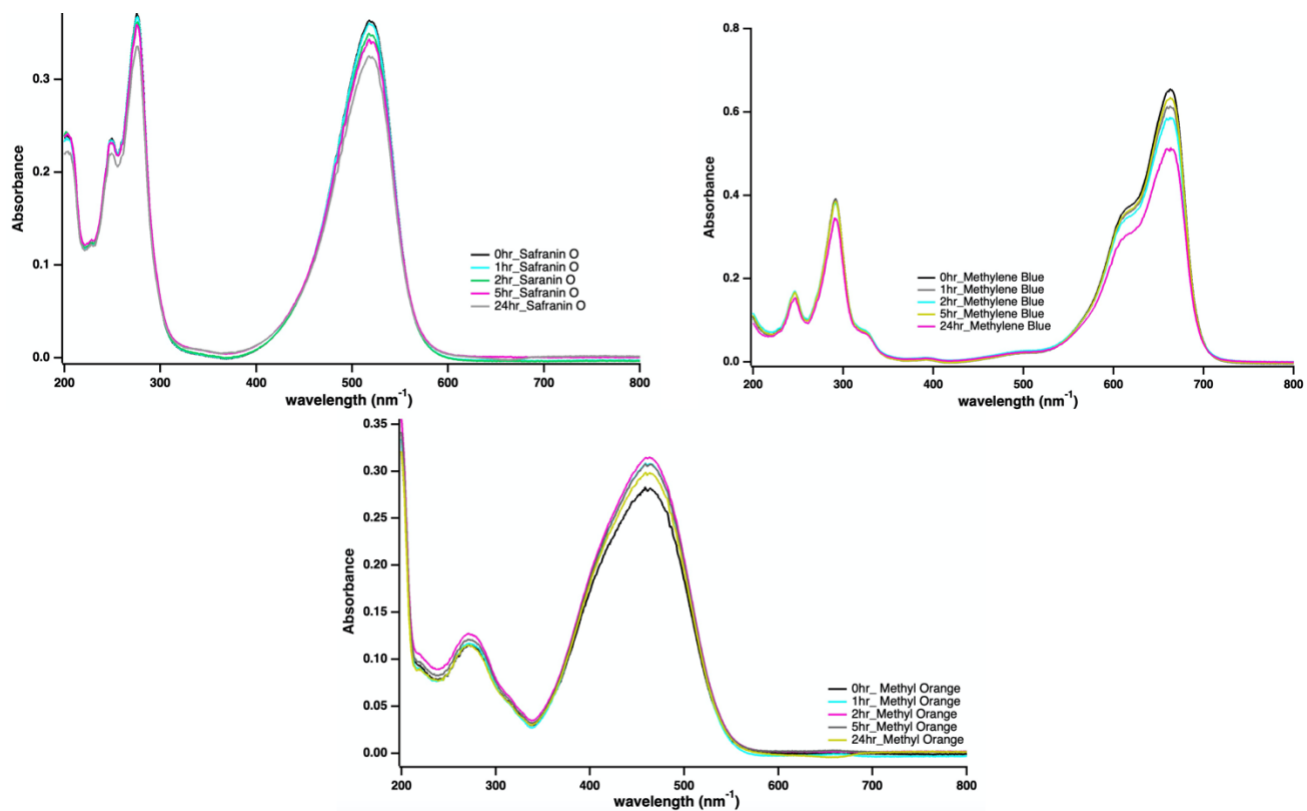

**Figure S15.** Control experiments of Safranin O and Methylene Blue left in ambient conditions for 24 hours.

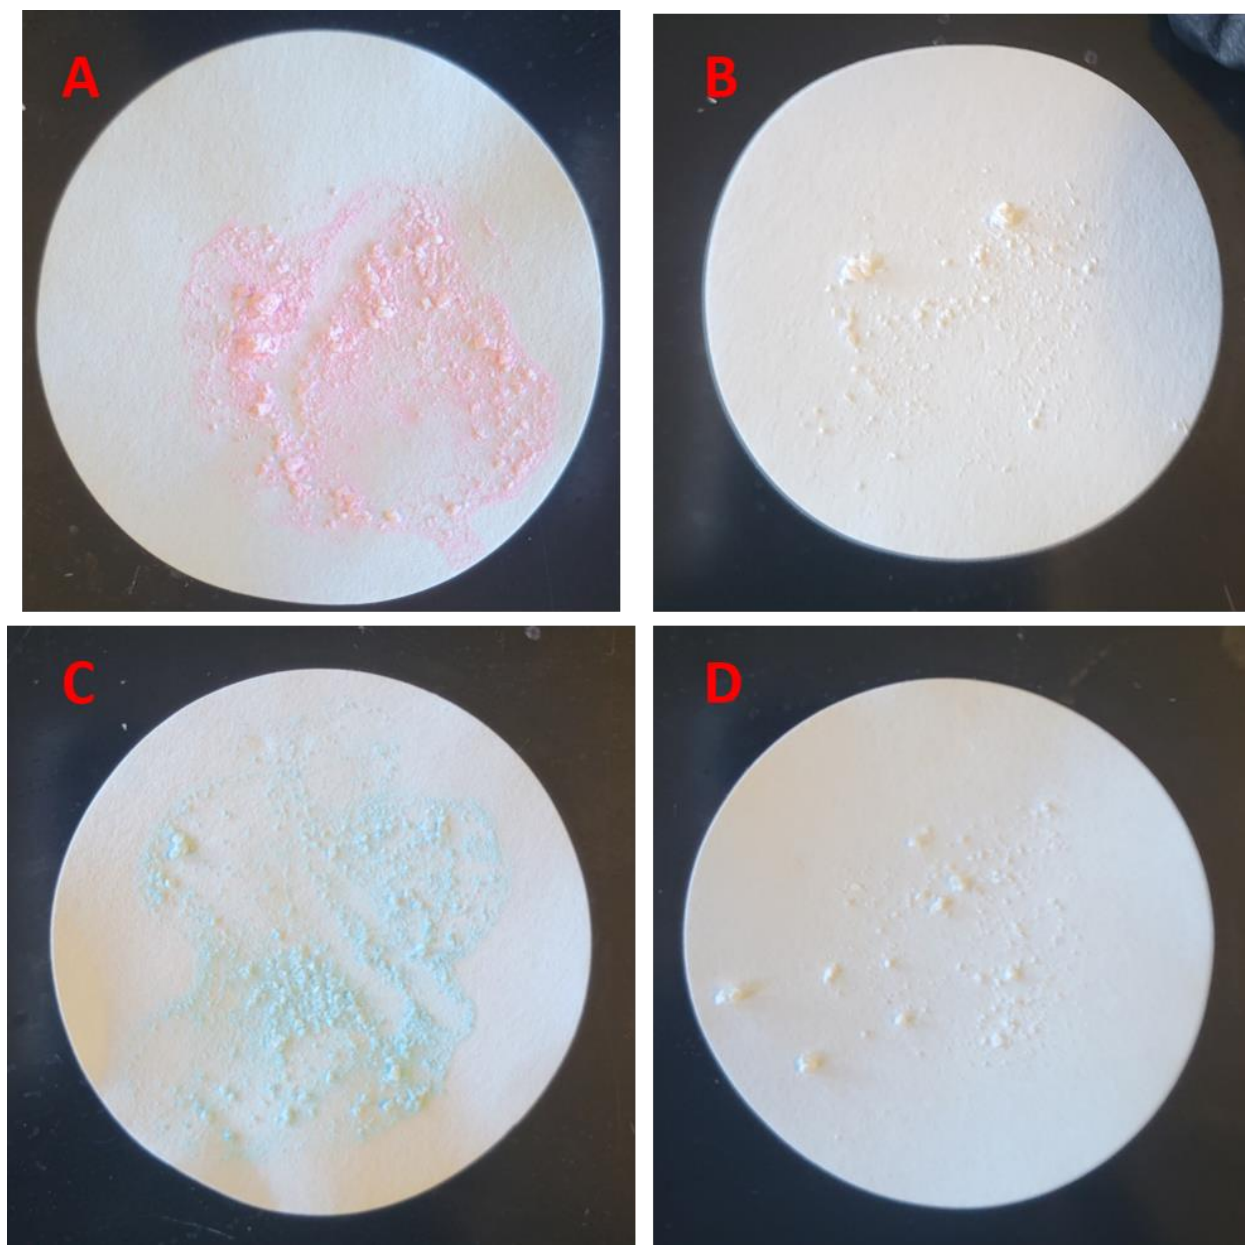

**Figure S16.** Visual demonstration of back-extraction of SO and MB with ethanol. **A)** **Zn<sub>poly</sub>-DOC** with adsorbed SO displaying pink color. **B)** **Zn<sub>poly</sub>-DOC** after back-extraction of SO with ethanol. **C)** **Zn<sub>poly</sub>-DOC** with adsorbed MB displaying blue color. **D)** **Zn<sub>poly</sub>-DOC** after back-extraction of MB with ethanol.

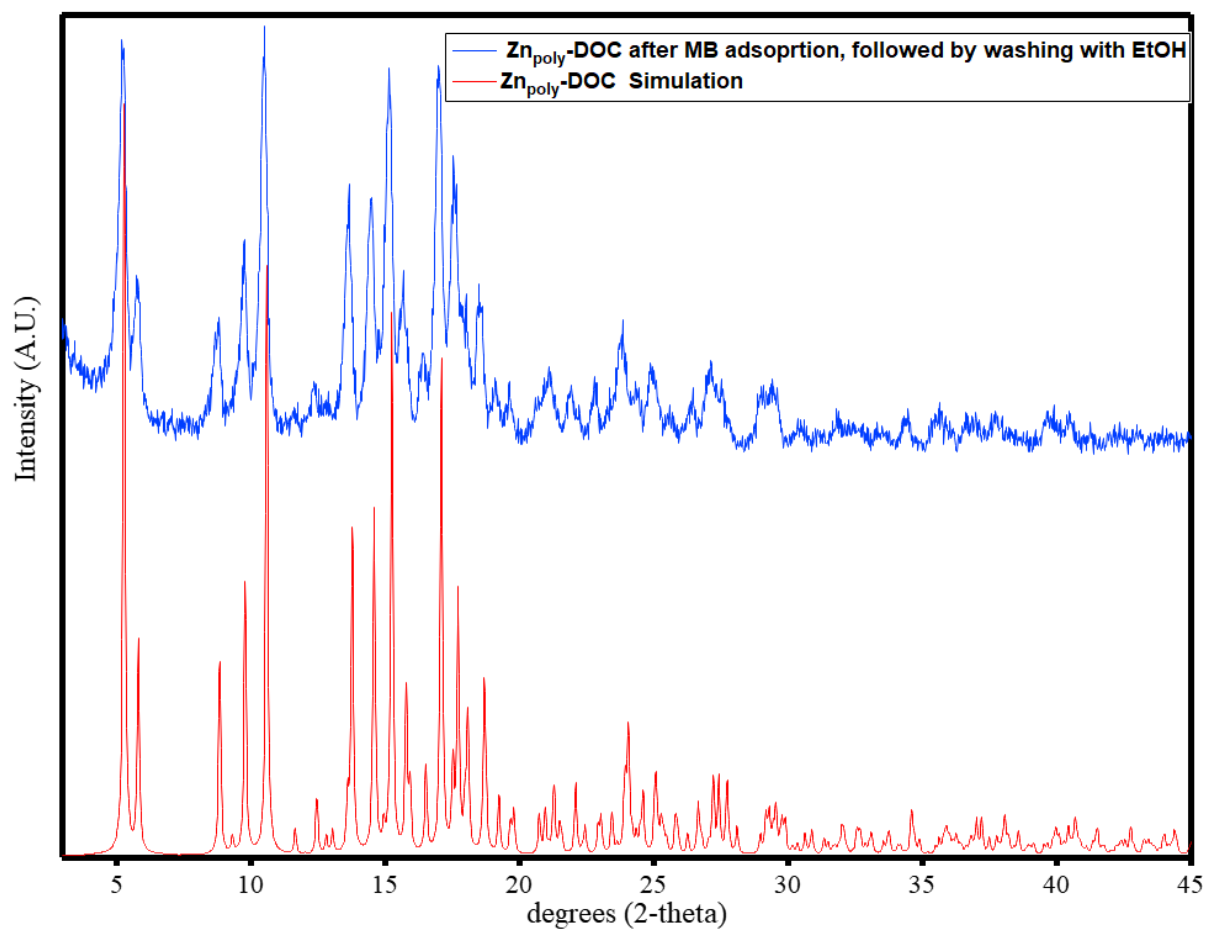

**Figure S17.** PXRD of **Zn<sub>poly</sub>-DOC** after adsorption of MB (methylene blue), followed by washing with ethanol, demonstrating that, unlike methanol, the ethanol wash does not change the polymeric structure.
